# Supplementary material for: A high-sugar diet produces obesity and insulin resistance in wild-type Drosophila
Source: PubMed Central journal article supplement — Dis Model Mech. 2011 Jun 30;4(6):842–9. doi: 10.1242/dmm.007948 (PMC3209653; doi:10.1242/dmm.007948), 2011-06-30
Supplement: supp_007948_DMM007948TableS1.pdf [file supp_007948_DMM007948TableS1.pdf]

**Table S1. Nutrient content of control and high sucrose, high fat, and high protein foods.** We modified Bloomington's semi-defined food to contain only sucrose. Calculations were based on manufacturer's (Becton, Dickinson, and Co.) datasheets.

|                                       | <b>carbs (g)</b> | <b>protein (g)</b> | <b>fat (g)</b> | <b>total kcal</b> |
|---------------------------------------|------------------|--------------------|----------------|-------------------|
| <b>control</b>                        |                  |                    |                |                   |
| agar                                  | 10g              | 8.9                |                | 0.1               |
| brewers yeast                         | 80g              | 32.0               | 36.0           | 0.8               |
| yeast extract                         | 20g              | 3.3                | 10.8           | 0.0               |
| peptone                               | 20g              | 0.1                | 14.6           | 0.0               |
| sucrose                               | 51g              | 51.0               | 0.0            | 0.0               |
| MgSO <sub>4</sub> x 6H <sub>2</sub> O |                  |                    |                |                   |
| CaCl <sub>2</sub> x 2H <sub>2</sub> O |                  |                    |                |                   |
| propionic acid                        |                  | 6.0                |                |                   |
| mold inhibitor                        |                  | 11.0               |                |                   |
| % carbs                               | 63.9%            |                    |                |                   |
| %fat                                  | 1.1%             |                    |                |                   |
| %protein                              | 34.0%            |                    |                |                   |
| total grams                           |                  | 112.3              | 61.4           | 0.9               |
| total kcal                            |                  | 449.2              | 245.7          | 7.7               |
|                                       |                  |                    |                | 702.6             |

|                                       | <b>carbs (g)</b> | <b>protein (g)</b> | <b>fat (g)</b> | <b>total kcal</b> |
|---------------------------------------|------------------|--------------------|----------------|-------------------|
| <b>high sucrose</b>                   |                  |                    |                |                   |
| agar                                  | 10g              | 8.9                |                | 0.1               |
| brewers yeast                         | 80g              | 32.0               | 36.0           | 0.8               |
| yeast extract                         | 20g              | 3.3                | 10.8           | 0.0               |
| peptone                               | 20g              | 0.1                | 14.6           | 0.0               |
| sucrose                               | 342g             | 342.0              | 0.0            | 0.0               |
| MgSO <sub>4</sub> x 6H <sub>2</sub> O |                  |                    |                |                   |
| CaCl <sub>2</sub> x 2H <sub>2</sub> O |                  |                    |                |                   |
| propionic acid                        |                  | 6.0                |                |                   |
| mold inhibitor                        |                  | 11.0               |                |                   |
| % carbs                               | 86.4%            |                    |                |                   |
| %fat                                  | 0.4%             |                    |                |                   |
| %protein                              | 13.2%            |                    |                |                   |
| total grams                           |                  | 403.3              | 61.4           | 0.9               |
| total kcal                            |                  | 1613.2             | 245.7          | 7.7               |
|                                       |                  |                    |                | 1866.6            |

|                                       |       | carbs (g) | protein (g) | fat (g) | total kcal |
|---------------------------------------|-------|-----------|-------------|---------|------------|
| <b>high fat</b>                       |       |           |             |         |            |
| agar                                  | 10g   | 8.9       |             | 0.1     |            |
| brewers yeast                         | 80g   | 32.0      | 36.0        | 0.8     |            |
| yeast extract                         | 20g   | 3.3       | 10.8        | 0.0     |            |
| peptone                               | 20g   | 0.1       | 14.6        | 0.0     |            |
| sucrose                               | 51g   | 51.0      | 0.0         | 0.0     |            |
| MgSO <sub>4</sub> x 6H <sub>2</sub> O |       |           |             |         |            |
| CaCl <sub>2</sub> x 2H <sub>2</sub> O |       |           |             |         |            |
| propionic acid                        |       | 6.0       |             |         |            |
| mold inhibitor                        |       | 11.0      |             |         |            |
| Crisco                                | 141g  |           |             | 141.0   |            |
| % carbs                               | 22.8% |           |             |         |            |
| %fat                                  | 64.7% |           |             |         |            |
| %protein                              | 12.5% |           |             |         |            |
| total grams                           |       | 112.3     | 61.4        | 141.9   |            |
| total kcal                            |       | 449.2     | 245.7       | 1276.7  | 1971.6     |

|                                       |       | carbs (g) | protein (g) | fat (g) | total kcal |
|---------------------------------------|-------|-----------|-------------|---------|------------|
| <b>high protein</b>                   |       |           |             |         |            |
| agar                                  | 10g   | 8.9       |             | 0.1     |            |
| brewers yeast                         | 80g   | 32.0      | 36.0        | 0.8     |            |
| yeast extract                         | 20g   | 3.3       | 10.8        | 0.0     |            |
| peptone                               | 20g   | 0.1       | 14.6        | 0.0     |            |
| sucrose                               | 51g   | 51.0      | 0.0         | 0.0     |            |
| MgSO <sub>4</sub> x 6H <sub>2</sub> O |       |           |             |         |            |
| CaCl <sub>2</sub> x 2H <sub>2</sub> O |       |           |             |         |            |
| propionic acid                        |       | 6.0       |             |         |            |
| mold inhibitor                        |       | 11.0      |             |         |            |
| Crisco                                | 66g   |           |             | 66.0    |            |
| soy protein (GNC)                     | 150g  |           | 130.0       | 5.0     |            |
| % carbs                               | 24.1% |           |             |         |            |
| % fat                                 | 34.8% |           |             |         |            |
| % protein                             | 41.1% |           |             |         |            |
| total grams                           |       | 112.3     | 191.4       | 71.9    |            |
| total kcal                            |       | 449.2     | 765.7       | 646.7   | 1861.6     |
