# Supplementary figures and images for: A high-sugar diet produces obesity and insulin resistance in wild-type Drosophila
Source: PubMed Central journal article supplement — Dis Model Mech. 2011 Jun 30;4(6):842–9. doi: 10.1242/dmm.007948 (PMC3209653; doi:10.1242/dmm.007948), 2011-06-30

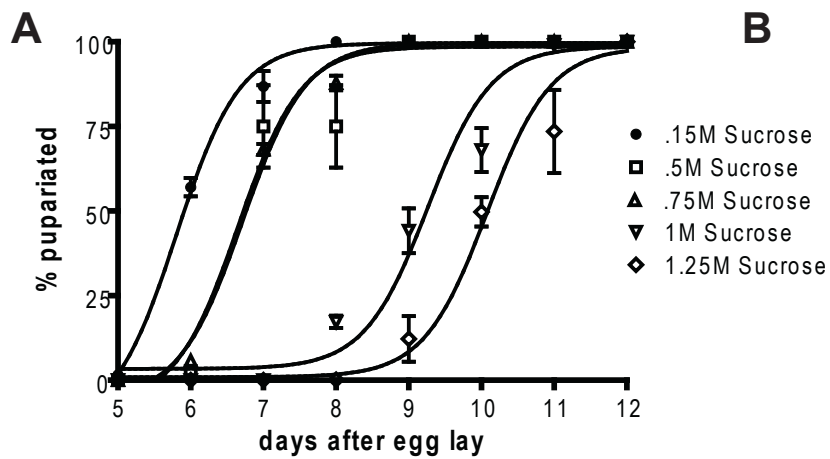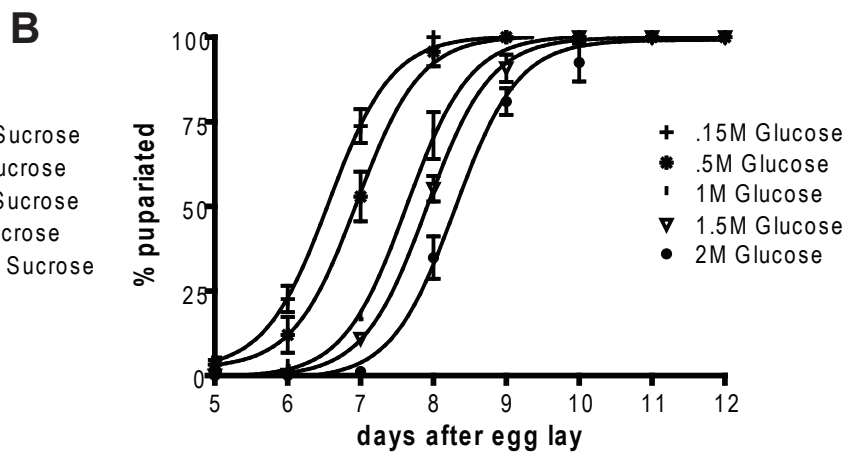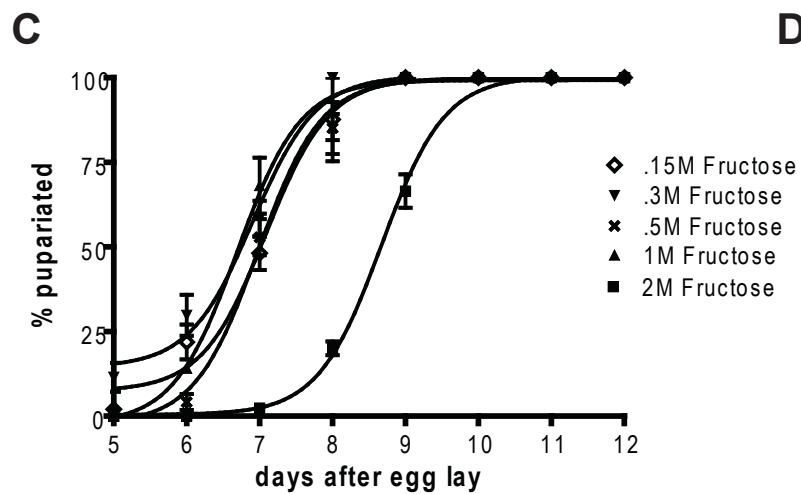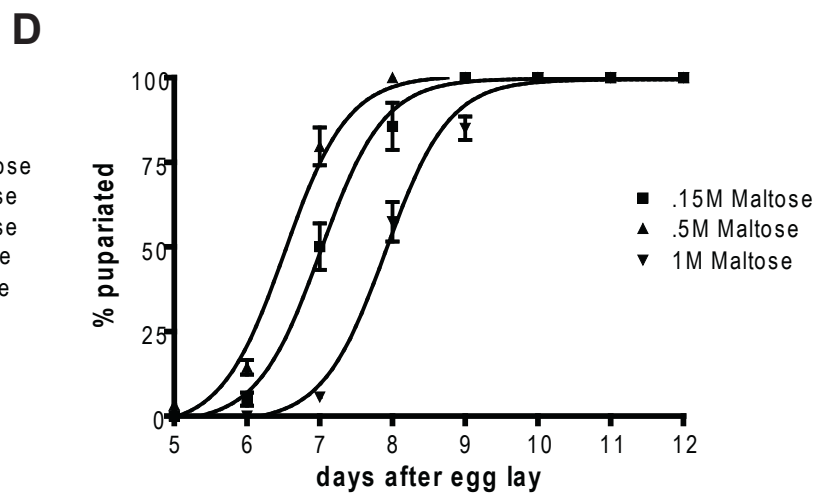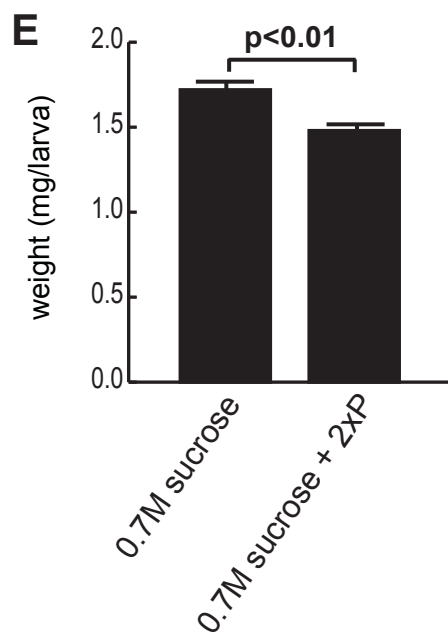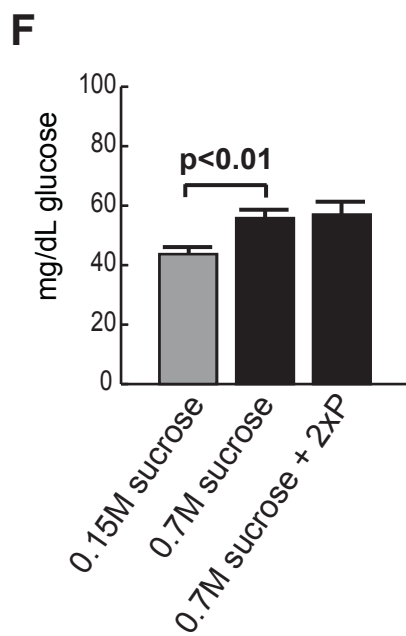

Supplement: supp_007948_DMM007948FigS1.pdf [file supp_007948_DMM007948FigS1.pdf]

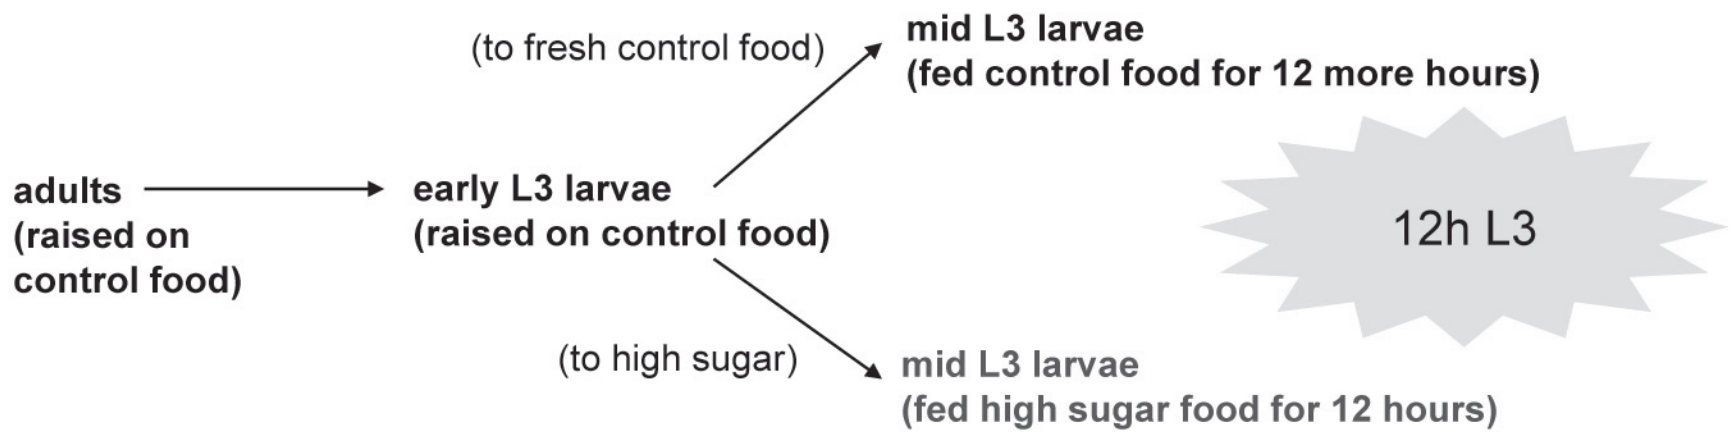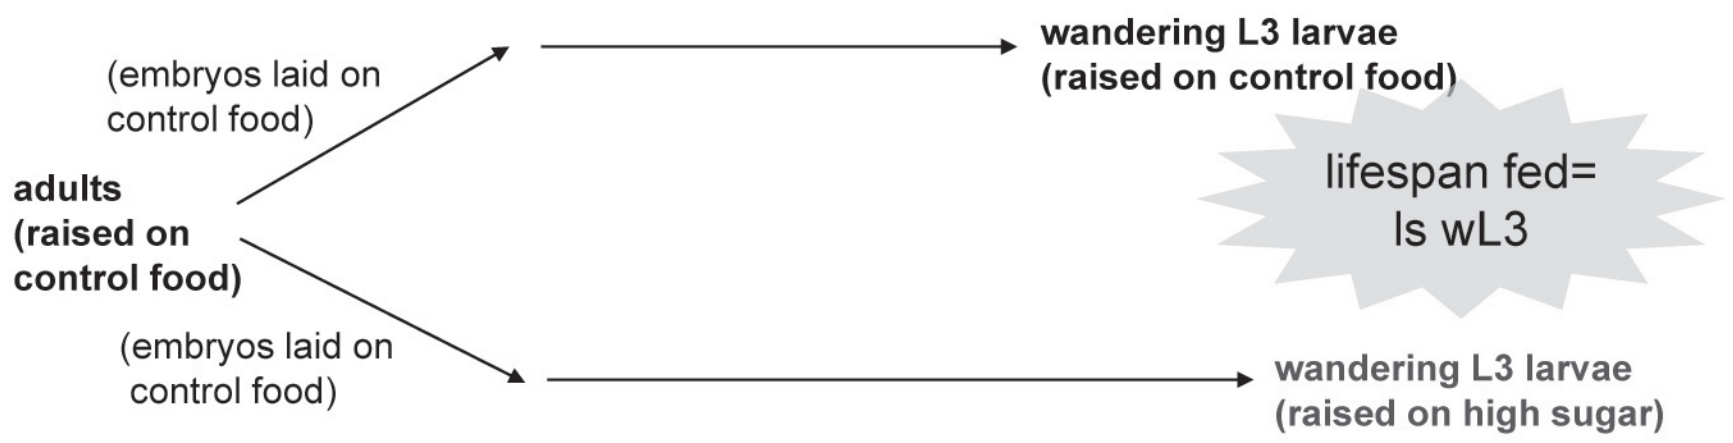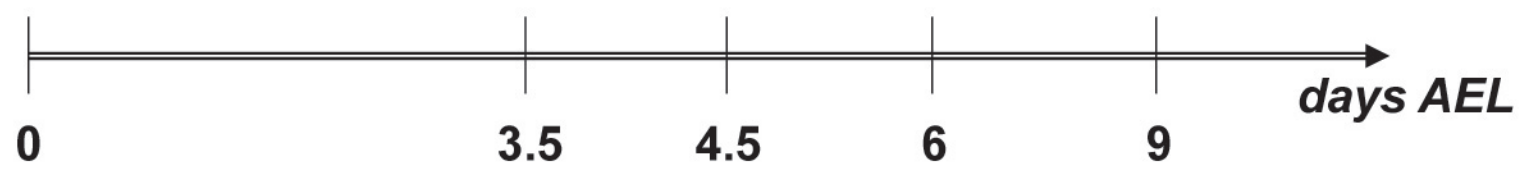

Supplement: supp_007948_DMM007948FigS2.pdf [file supp_007948_DMM007948FigS2.pdf]
